# Supplementary material
Source: Elsevier journal article supplement (https://www.sciencedirect.com/science/article/pii/S2530064420300821)
Supplement: mmc1 [file S2530064420300821:mmc1.docx]

**Supplementary material for:**

*Cudney-Valenzuela et al. Does patch quality drive arboreal mammal assemblages in fragmented rainforests? Perspectives in Ecology and Conservation*

**Figure S1**. Number of arboreal mammals (black) recorded in 20 forest patches and the proportion of occupied patches (gray) in the Lacandona rainforest, Mexico.

**Table S1**. Tree height (m) of four canopy trees (mean ± SD) and one midstory tree sampled in each of the 20 forest patches studied in the Lacandona rainforest, Mexico. The height (m) at which we placed a camera trap in each tree is also indicated.

| Patch ID | Canopy trees (n = 4) | | Midstory tree (n = 1) | |
| --- | --- | --- | --- | --- |
| Tree height | Camera height | Tree height | Camera height |
| 1 | 18.9 ± 5.4 | 13.5 ± 4.7 | 7.2 | 3.8 |
| 2 | 16.65 ± 4.6 | 12.9 ± 4.9 | 9.3 | 1.6 |
| 3 | 17.9 ± 3.1 | 10.2 ± 3.9 | 11.5 | 2.6 |
| 4 | 32.5 ± 3.8 | 20.5 ± 1.6 | 6.2 | 1.8 |
| 5 | 17.2 ± 2.0 | 8.6 ± 2.7 | 10.6 | 1.7 |
| 6 | 23.1 ± 6.5 | 17.3 ± 3.5 | 4.6 | 1.8 |
| 7 | 17.35 ± 3.8 | 14.5 ± 3.0 | 10.8 | 2.3 |
| 8 | 17.5 ± 5.9 | 14.2 ± 2.4 | 9.2 | 1.6 |
| 9 | 26.1 ± 5.4 | 16 ± 6.2 | 5.8 | 1.6 |
| 10 | 20.3 ± 3.9 | 13.8 ± 5.3 | 5.2 | 2.5 |
| 11 | 27.1 ± 4.0 | 16.8 ± 4.1 | 19.6 | 1.9 |
| 12 | 19.9 ± 4.0 | 14 ± 1.7 | 5.0 | 1.5 |
| 13 | 22.8 ± 7.0 | 17.5 ± 5.3 | 3.4 | 1.8 |
| 14 | 19.7 ± 4.1 | 14 ± 2.9 | 12.9 | 1.8 |
| 15 | 23.7 ± 3.0 | 12.4 ±3.2 | 5.5 | 2.6 |
| 16 | 23.3 ± 3.8 | 15.5 ± 5.4 | 6.2 | 1.6 |
| 17 | 24.3 ± 8.7 | 16.2 ± 2.3 | 7.5 | 2.0 |
| 18 | 23.4 ± 4.8 | 17.7 ± 5.0 | 16.9 | 1.8 |
| 19 | 26.4 ± 9.9 | 14.8 ± 4.0 | 18.2 | 1.6 |
| 20 | 18 ± 6.2 | 13.7 ± 3.4 | 6.7 | 1.6 |

**Table S2**. Sampling effort *per* *site* and number of independent records of arboreal mammals sampled in 20 forest patches from the Lacandona rainforest, Mexico (A.pi = *Alouatta pigra*; A.ge = *Ateles geoffroyi*; C.de = *Caluromys derbianus*; C.me = *Coendou mexicanus*; D.ma = *Didelphis marsupialis*; E.ba = *Eira barbara*; L.wi = *Leopardus wiedii*; M.me = *Marmosa mexicana*; N.na = *Nasua narica*; P.op = *Philander opossum*; P.fl = *potos flavus*; P.lo= *Procyon lotor*; S.au = *Sciurus aureogaster*; S.de = *Sciurus deppei*; T.me = *Tamandua mexicana*). Habitat use classification based on the IUCN is also indicated: OGS = Old Growth Specialist; SGT = Second Growth Tolerant; HG = Habitat Generalist.

| Patch ID | Nights total | Nights  active | A. pi | A. ge | C.de | C.me | D.ma | E.ba | L.wi | M.me | N.na | P.op | P.fl | P.lo | S.au | S.de | T.me |
| --- | --- | --- | --- | --- | --- | --- | --- | --- | --- | --- | --- | --- | --- | --- | --- | --- | --- |
| 1 | 368 | 298 | 7 | 11 | 1 | 0 | 0 | 0 | 1 | 0 | 8 | 3 | 5 | 0 | 2 | 11 | 0 |
| 2 | 373 | 283 | 17 | 0 | 8 | 0 | 5 | 1 | 0 | 14 | 0 | 3 | 8 | 0 | 1 | 10 | 0 |
| 3 | 361 | 328 | 1 | 0 | 5 | 0 | 9 | 0 | 0 | 3 | 1 | 2 | 6 | 0 | 1 | 10 | 0 |
| 4 | 363 | 325 | 4 | 0 | 4 | 1 | 8 | 0 | 0 | 13 | 5 | 6 | 15 | 0 | 2 | 3 | 1 |
| 5 | 368 | 296 | 0 | 0 | 3 | 12 | 7 | 0 | 0 | 7 | 0 | 5 | 9 | 0 | 9 | 13 | 2 |
| 6 | 370 | 338 | 3 | 23 | 10 | 1 | 2 | 0 | 0 | 7 | 0 | 4 | 7 | 0 | 2 | 9 | 0 |
| 7 | 369 | 326 | 27 | 14 | 9 | 5 | 5 | 0 | 1 | 7 | 0 | 2 | 23 | 0 | 2 | 46 | 4 |
| 8 | 359 | 288 | 4 | 1 | 2 | 5 | 6 | 1 | 0 | 7 | 0 | 5 | 16 | 0 | 4 | 32 | 3 |
| 9 | 375 | 281 | 3 | 0 | 9 | 1 | 6 | 0 | 0 | 1 | 8 | 8 | 20 | 0 | 12 | 23 | 5 |
| 10 | 385 | 297 | 8 | 11 | 12 | 1 | 2 | 0 | 0 | 0 | 0 | 0 | 7 | 0 | 1 | 9 | 2 |
| 11 | 369 | 296 | 6 | 16 | 1 | 0 | 7 | 0 | 0 | 6 | 1 | 0 | 12 | 5 | 0 | 18 | 2 |
| 12 | 363 | 306 | 3 | 0 | 26 | 0 | 6 | 4 | 0 | 7 | 5 | 5 | 19 | 0 | 10 | 22 | 3 |
| 13 | 367 | 291 | 4 | 1 | 11 | 12 | 7 | 0 | 0 | 11 | 1 | 21 | 21 | 0 | 6 | 19 | 3 |
| 14 | 383 | 343 | 8 | 0 | 11 | 1 | 3 | 1 | 0 | 11 | 0 | 0 | 11 | 0 | 5 | 29 | 4 |
| 15 | 361 | 331 | 5 | 0 | 20 | 1 | 7 | 0 | 0 | 2 | 0 | 7 | 20 | 0 | 9 | 17 | 7 |
| 16 | 375 | 323 | 13 | 12 | 9 | 0 | 1 | 0 | 0 | 5 | 0 | 0 | 9 | 0 | 4 | 4 | 1 |
| 17 | 383 | 326 | 28 | 2 | 3 | 1 | 3 | 0 | 0 | 4 | 5 | 0 | 29 | 0 | 6 | 12 | 1 |
| 18 | 378 | 318 | 23 | 2 | 9 | 0 | 2 | 0 | 0 | 1 | 0 | 0 | 21 | 0 | 10 | 4 | 6 |
| 19 | 334 | 301 | 6 | 0 | 2 | 1 | 3 | 0 | 0 | 2 | 2 | 0 | 3 | 0 | 2 | 5 | 0 |
| 20 | 383 | 338 | 0 | 0 | 12 | 11 | 2 | 0 | 0 | 5 | 2 | 0 | 16 | 0 | 0 | 14 | 0 |
|  | Habitat use | | SGT | OGS | HG | SGT | HG | HG | OGS | SGT | SGT | SGT | SGT | HG | HG | HG | SGT |

**Table S3**. Pearson correlation coefficients between each pair of vegetation variables.

|  | Canopy cover | Canopy width | Epiphyte cover | Liana BA | Liana density | Total liana BA | Total tree BA | Tree BA | Tree connectivity | Tree density | Tree height |
| --- | --- | --- | --- | --- | --- | --- | --- | --- | --- | --- | --- |
| Canopy width | 0.5 |  |  |  |  |  |  |  |  |  |  |
| Epiphyte cover | 0.16 | 0.17 |  |  |  |  |  |  |  |  |  |
| Liana BA | 0.4 | 0.9 | 0.28 |  |  |  |  |  |  |  |  |
| Liana density | -0.6 | -0.65 | -0.07 | -0.52 |  |  |  |  |  |  |  |
| Total liana BA | -0.35 | -0.16 | 0.25 | 0.07 | 0.74 |  |  |  |  |  |  |
| Total tree BA | 0.3 | 0.72 | 0.09 | 0.63 | -0.3 | -0.11 |  |  |  |  |  |
| Tree BA | 0.32 | 0.8 | 0.22 | 0.7 | -0.4 | -0.09 | 0.92 |  |  |  |  |
| Tree connectivity | 0.35 | 0.4 | 0.26 | 0.6 | -0.4 | -0.2 | 0.5 | 0.5 |  |  |  |
| Tree density | -0.12 | -0.34 | -0.45 | -0.34 | 0.35 | 0.01 | -0.06 | -0.4 | -0.13 |  |  |
| Tree height | 0.64 | 0.9 | 0.2 | 0.8 | -0.64 | -0.19 | 0.72 | 0.7 | 0.4 | -0.2 |  |
| Patch size | 0.39 | 0.72 | 0.02 | 0.78 | -0.38 | 0.12 | 0.4 | 0.38 | 0.4 | 0.01 | 0.73 |
